# Supplementary material for: A deep learning hybrid predictive modeling (HPM) approach for estimating evapotranspiration and ecosystem respiration
Source: Copernicus journal article supplement (doi:10.5194/hess-25-6041-2021), 2021-11-25
Supplement: Supplementary file 1 [file hess-25-6041-2021-supplement.pdf]

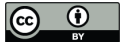

*Supplement of*

## **A deep learning hybrid predictive modeling (HPM) approach for estimating evapotranspiration and ecosystem respiration**

**Jiancong Chen et al.**

*Correspondence to:* Jiancong Chen ([nigel\\_chen1993@berkeley.edu](mailto:nigel_chen1993@berkeley.edu))

The copyright of individual parts of the supplement might differ from the article licence.

## Supplementary Materials

### 1. Deep Learning Model Configuration

Table S.1 Configuration of Deep-Learning Module

| Layer   | Output Shape | Parameters # | Note                  |
|---------|--------------|--------------|-----------------------|
| LSTM    | [50, 1]      | 11600        |                       |
| LSTM    | [25]         | 7600         |                       |
| Dropout | [25]         | 0            | Rate = 0.1            |
| Dense   | [8]          | 208          | L2 regularizers, 0.01 |
| Dropout | [8]          | 0            | Rate = 0.1            |
| Dense   | [1]          | 9            | Output Layer          |

### 2. CLM performance at US-NR1

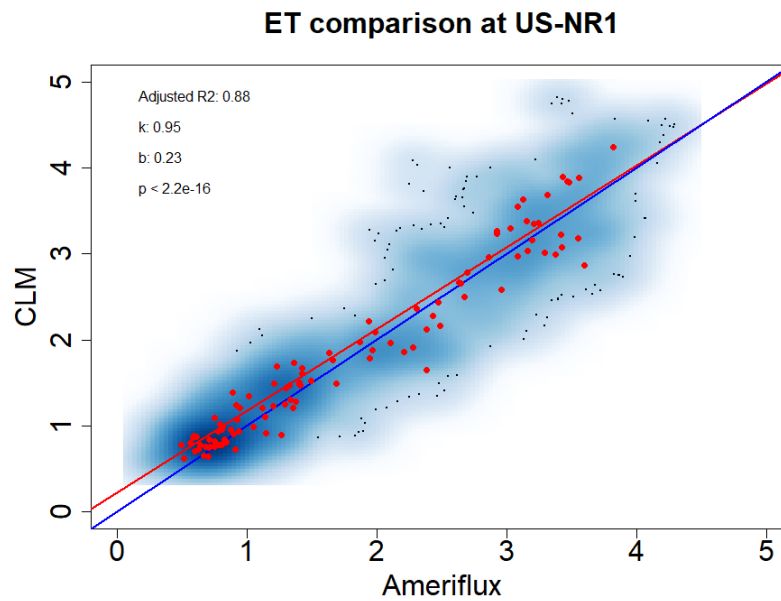

Figure S1. Comparison of ET estimation from CLM and flux tower measurements at US-NR1. Consistency between CLM estimation and direct measurement from flux tower is observed.

### 3. Comparison of HPM estimations at the East River Watershed to other studies

## ET estimation from HPM and MODIS at DF1

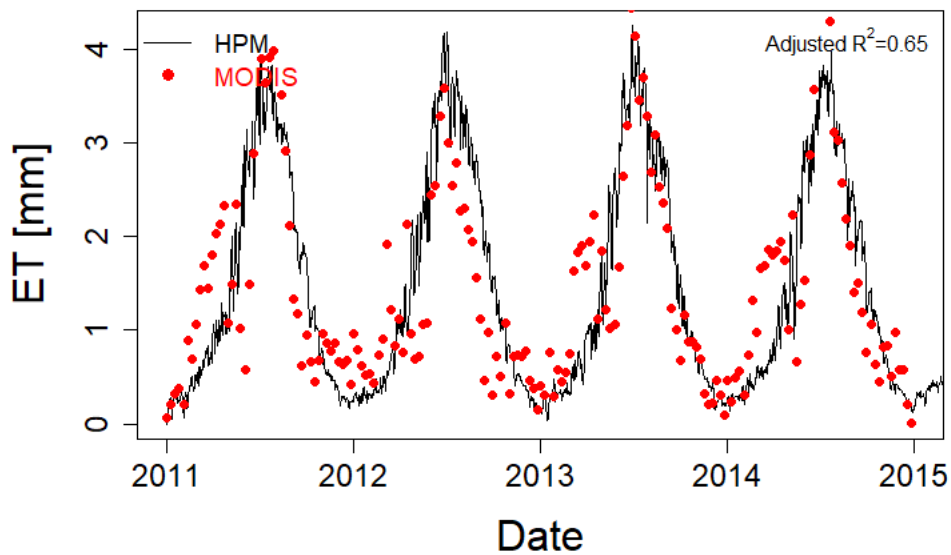

**Figure S2. Comparison of 8-day averaged ET estimation from HPM and Mu et al. (2013) at deciduous forests site in East River Watershed.**

HPM-based ET estimation at East River Watershed is comparable to Mu et al. (2013), where ET is computed based upon the logic of the Penman-Monteith equation and MODIS remote sensing data (Fig. S2), and the HPM-based  $R_{ECO}$  estimation is comparable to what Berryman et al. (2018) discovered, with growing season  $R_{ECO}$  ranging between 555 to 607  $gCm^{-2}$  and mean growing season  $R_{ECO}$  ranging between 3.01 to 3.30  $gCm^{-2}$ . Annual ET between deciduous forests and evergreen forests are not statistically different, which is similar to Mu et al. (2013). Annual  $R_{ECO}$  differences between evergreen forests and deciduous forests are around 50  $gCm^{-2}$ , which is comparable to Berryman et al. 2018.

### **3. Distribution of NDVI at the East River Watershed between 2012 and 2015**

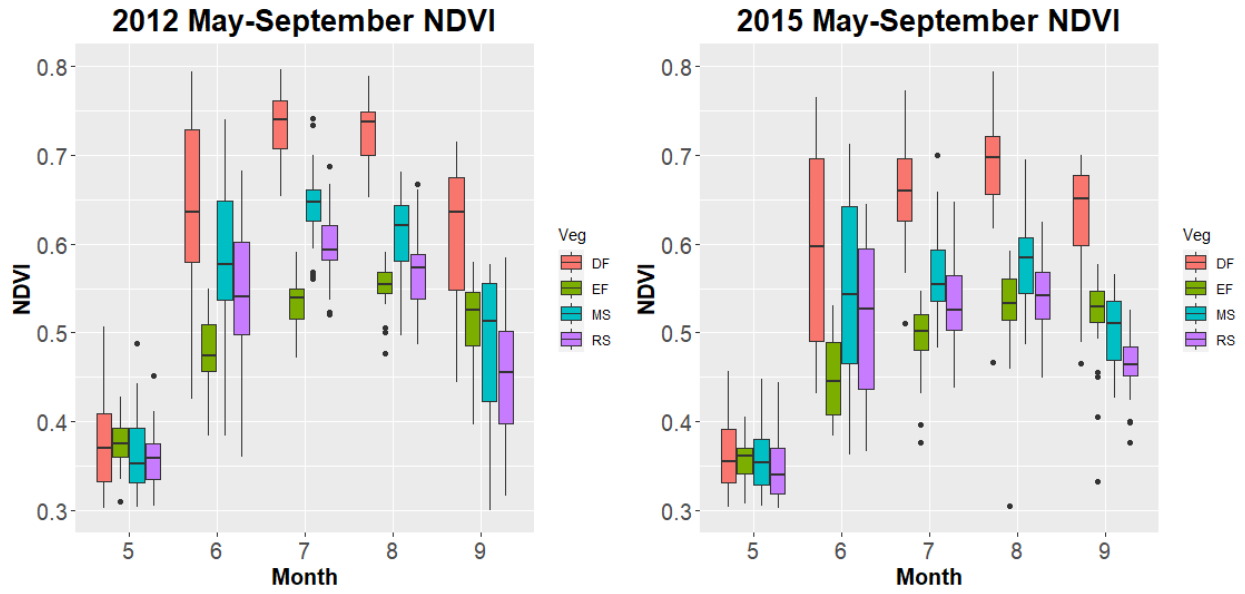

Figure S3. 2012 and 2015 distribution of NDVI at the East River Watershed

**4. Meteorological forcings heterogeneity within East River Watershed and across SNOTEL stations**

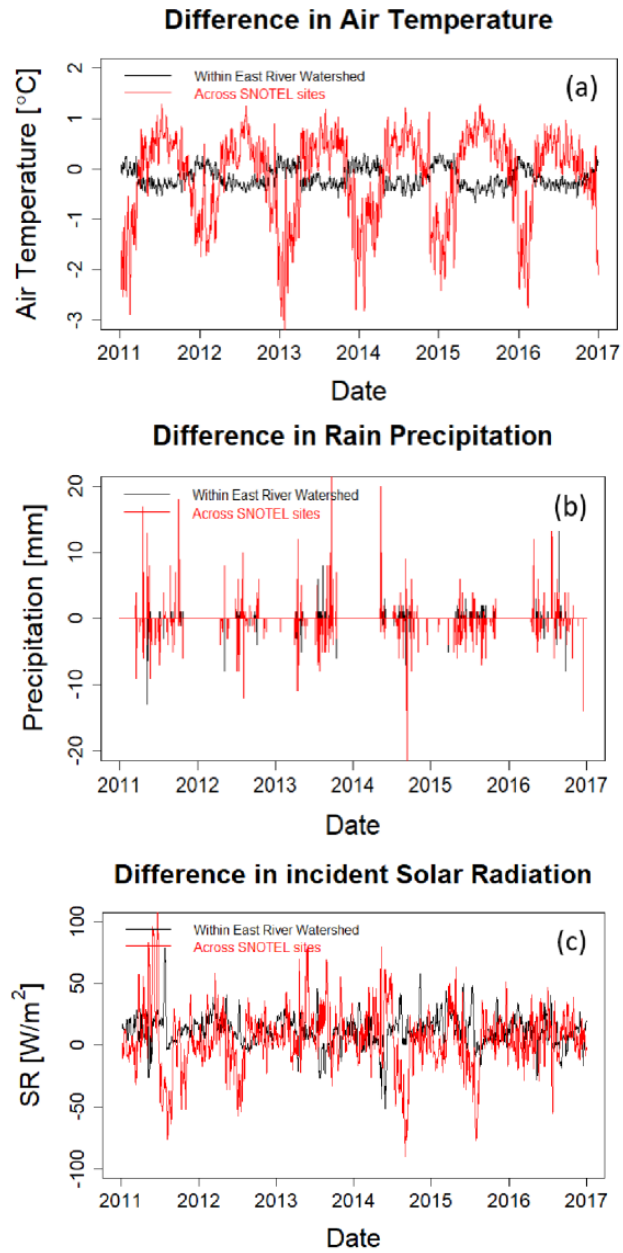

Figure S4. Meteorological forcings heterogeneity within East River Watersheds (DF1 and EF1, black lines) with DAYMET data and across SNOTEL stations (ER-BT and ER-PK, red lines) with SNOTEL data.

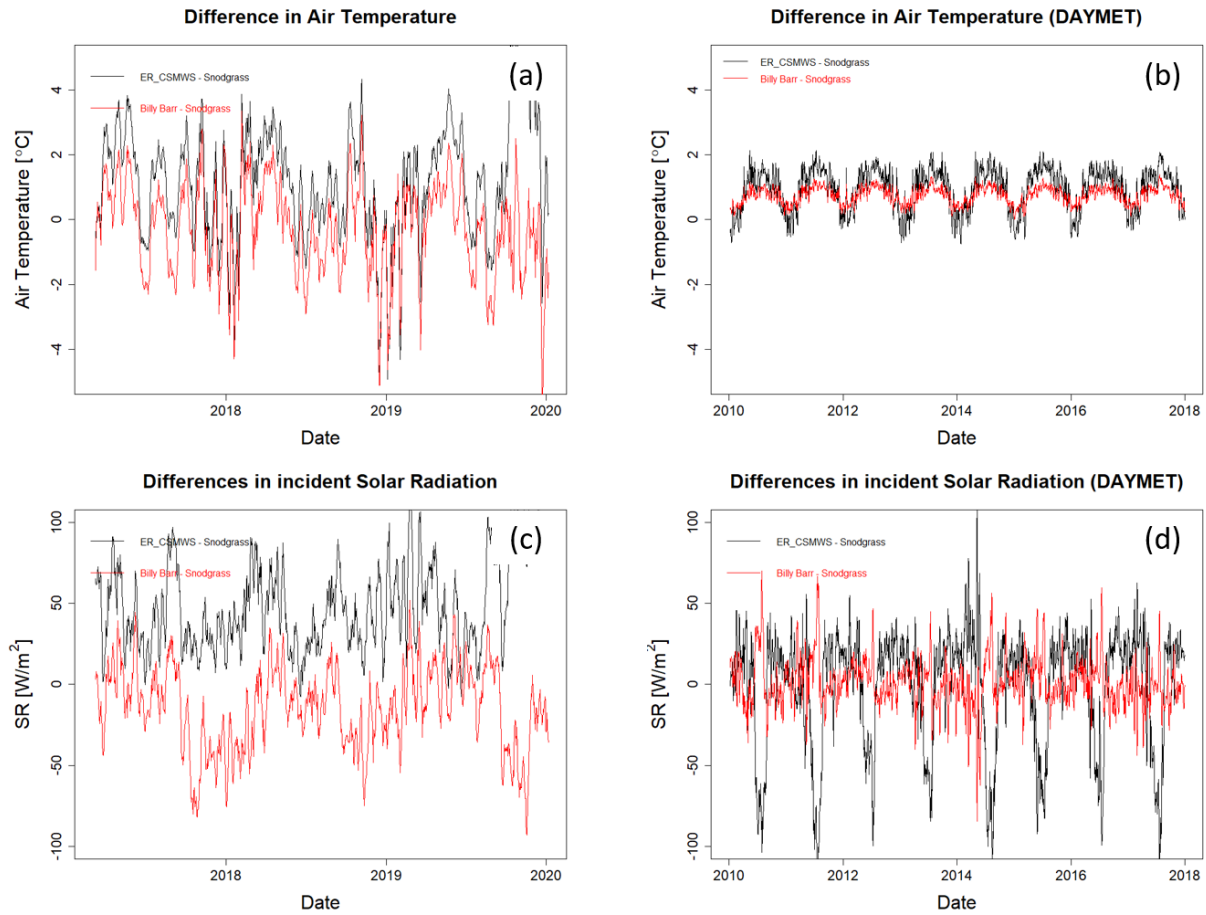

**Figure S5. Differences in air temperature and incident solar radiation among three weather stations (ER\_CSMWS, Snodgrass and Billy Barr) locations within the East River Watershed. Panel (a) and (c) present data from weather stations obtained from <https://wfsfa-data.lbl.gov/>. Panel (b) and (d) present data obtained from DAYMET.**
